# Supplementary material
Source: PubMed Central journal article supplement (PMC1691236)

These are electronic appendices to the paper by Hebert et al. 2003 Biological identifications through DNA barcodes. *Proc. R. Soc. Lond. B* **270**, 313–321.

Electronic appendices are refereed with the text. However, no attempt has been made to impose a uniform style on the electronic appendices.

#### APPENDIX A:

| Code            | Higher Taxonomy                       | Species                                               | Genbank Acc. # |
|-----------------|---------------------------------------|-------------------------------------------------------|----------------|
| <b>Chordata</b> |                                       |                                                       |                |
| Profile         |                                       |                                                       |                |
| CH 1            | Vertebrata; Actinopterygii            | <i>Danio rerio</i>                                    | NC_002333      |
| CH 2            | Vertebrata; Amphibia; Anura           | <i>Xenopus laevis</i>                                 | NC_001573      |
| CH 3            | Vertebrata; Dipnoi                    | <i>Protopterus dolloi</i>                             | NC_001708      |
| CH 4            | Vertebrata; Chondrichthyes            | <i>Mustelus manazo</i>                                | NC_000890      |
| CH 5            | Vertebrata; Sauropsida; Crocodylidae  | <i>Alligator mississippiensis</i>                     | NC_001922      |
| CH 6            | Vertebrata; Mammalia; Primates        | <i>Homo sapiens</i>                                   | NC_001807      |
| CH 7            | Vertebrata; Hyperoartia               | <i>Lampetra fluviatilis</i>                           | NC_001131      |
| CH 8            | Vertebrata; Lepidosauria              | <i>Dinodon semicarinatus</i>                          | NC_001945      |
| CH 9            | Hyperotreti                           | <i>Myxine glutinosa</i>                               | NC_002639      |
| CH 10           | Cephalochordata                       | <i>Branchiostoma floridae</i>                         | NC_000834      |
| Test            |                                       |                                                       |                |
| CH11            | Vertebrata; Testudines                | <i>Chelonia mydas</i>                                 | NC_000886      |
| CH12            | Vertebrata; Amphibia; Caudata         | <i>Mertensiella luschani</i>                          | NC_002756      |
| CH13            | Vertebrata; Sauropsida; Aves          | <i>Struthio camelus</i>                               | NC_002785      |
| CH14            | Vertebrata; Mammalia; Cetartiodactyla | <i>Bos taurus</i>                                     | NC_001567      |
| CH15            | Vertebrata; Actinopterygii; Teleostei | <i>Salmo salar</i>                                    | NC_001960      |
| <b>Annelida</b> |                                       |                                                       |                |
| Profile         |                                       |                                                       |                |
| AN 1            | Branchiobdellae                       | <i>Xironidrilus formosus</i>                          | AF310721       |
| AN 2            | Hirudinida; Glossiphoniidae           | <i>Theromyzon bifarium</i>                            | AY047330       |
| AN 3            | Hirudinida; Hirudinidae               | <i>Hirudo medicinalis</i>                             | U74067         |
| AN 4            | Hirudinida; Erpobdellidae             | <i>Erpobdella testacea</i>                            | AF116027       |
| AN 5            | Oligochaeta; Tubificidae              | <i>Tubifex tubifex</i>                                | U74076         |
| AN 6            | Oligochaeta; Lumbricidae              | <i>Lumbricus terrestris</i>                           | NC_001673      |
| AN 7            | Oligochaeta; Megascolecidae           | <i>Pontodrilus bermudensis</i>                        | AF003256       |
| AN 8            | Polychaeta; Alvinellidae              | <i>Paralvinella palmiformis</i>                       | U74070         |
| AN 9            | Polychaeta; Eunicidae                 | <i>Marphysa sanguinea</i>                             | AY040708       |
| AN 10           | Polychaeta; Terebellidae              | <i>Loimia medusa</i>                                  | AY040704       |
| Test            |                                       |                                                       |                |
| AN11            | Oligochaeta; Lumbriculidae            | <i>Eclipidrilus frigidus</i><br><i>Monopylephorus</i> | AY040706       |
| AN12            | Oligochaeta; Tubificidae              | <i>rubroniveus</i>                                    | AY040709       |
| AN13            | Hirudinida; Piscicolidae              | <i>Stibarobdella macrothela</i>                       | AF116022       |
| AN14            | Hirudinida; Haemadipsidae             | <i>Chtonobdella bilineata</i>                         | AF003267       |
| AN15            | Polychaeta; Nereididae                | <i>Platynereis dumerilii</i>                          | NC_000931      |
| <b>Nematoda</b> |                                       |                                                       |                |
| Profile         |                                       |                                                       |                |
| NE 1            | Rhabditoidea                          | <i>Caenorhabditis elegans</i>                         | NC_001328      |

|             |                                 |                                  |           |
|-------------|---------------------------------|----------------------------------|-----------|
| NE 2        | Ascaridida; Ascarididae         | <i>Ascaris suum</i>              | NC_001327 |
|             |                                 | <i>Contraecum cf.</i>            |           |
| NE 3        | Ascaridida; Anisakidae          | <i>spiculigerum</i>              | U57031    |
| NE 4        | Strongylida; Trichostrongylidae | <i>Trichostrongylus axei</i>     | U57041    |
| NE 5        | Strongylida; Haemonchidae       | <i>Ostertagia circumcincta</i>   | U57036    |
| NE 6        | Strongylida; Ancylostomatidae   | <i>Necator americanus</i>        | NC_003416 |
|             |                                 | <i>Heligmosomoides</i>           |           |
| NE 7        | Strongylida; Heligmosomatidae   | <i>polygyrus</i>                 | U57034    |
| NE 8        | Enoplea                         | <i>Trichinella spiralis</i>      | NC_002681 |
| NE 9        | Spirurida                       | <i>Onchocerca volvulus</i>       | NC_001861 |
| NE 10       | Spirurida; Filarioidea          | <i>Wuchereria bancrofti</i>      | AJ271612  |
| <b>Test</b> |                                 |                                  |           |
| NE11        | Strongyloididae                 | <i>Strongyloides stercoralis</i> | U57039    |
| NE12        | Strongylida; Haemonchidae       | <i>Haemonchus contortus</i>      | U57033    |
| NE13        | Strongylida; Ancylostomatidae   | <i>Ancylostoma duodenale</i>     | NC_003415 |
| NE14        | Strongylida; Strongylidae       | <i>Strongylus vulgaris</i>       | U57040    |
|             |                                 | <i>Nippostrongylus</i>           |           |
| NE15        | Strongylida; Heligmonellidae    | <i>brasiliensis</i>              | U57035    |

## Platyhelminthes

### Profile

|       |                           |                               |           |
|-------|---------------------------|-------------------------------|-----------|
| PL 1  | Turbellaria; Acoelomorpha | <i>Meara sp.</i>              | AJ405973  |
| PL 2  | Trematoda; Strigeidida    | <i>Schistosoma mansoni</i>    | NC_002545 |
| PL 3  | Trematoda; Strigeidida    | <i>Schistosoma japonicum</i>  | NC_002544 |
| PL 4  | Trematoda; Echinostomida  | <i>Fasciola hepatica</i>      | NC_002546 |
| PL 5  | Trematoda; Plagiorchiida  | <i>Paragonimus westermani</i> | NC_002354 |
|       |                           | <i>Diphyllobothrium</i>       |           |
| PL 6  | Cestoda; Pseudophyllidea  | <i>nihonkaiense</i>           | AB015755  |
| PL 7  | Cestoda; Pseudophyllidea  | <i>Spirometra erinacei</i>    | AB015754  |
| PL 8  | Cestoda; Hymenolepididae  | <i>Hymenolepis diminuta</i>   | NC_002767 |
|       |                           | <i>Echinococcus</i>           |           |
| PL 9  | Cestoda; Taeniidae        | <i>multilocularis</i>         | NC_000928 |
| PL 10 | Cestoda; Taeniidae        | <i>Taenia asiatica</i>        | AB066494  |

### Test

|      |                          |                               |           |
|------|--------------------------|-------------------------------|-----------|
| PL11 | Trematoda; Strigeidida   | <i>Schistosoma mekongi</i>    | NC_002529 |
| PL12 | Trematoda; Strigeidida   | <i>Schistosoma malayensis</i> | AF295106  |
| PL13 | Cestoda; Pseudophyllidea | <i>Sparganum proliferum</i>   | AB015753  |
| PL14 | Cestoda; Taeniidae       | <i>Taenia crassiceps</i>      | NC_002547 |
| PL15 | Cestoda; Taeniidae       | <i>Taenia solium</i>          | NC_004022 |

## Arthropoda

### Profile

|      |                                              |                                   |           |
|------|----------------------------------------------|-----------------------------------|-----------|
| AR 1 | Myriapoda; Chilopoda;<br>Scutigromorpha      | <i>Allothreua maculata</i>        | AF370834  |
| AR 2 | Myriapoda; Chilopoda;<br>Craterostigmomorpha | <i>Craterostigmus tasmanianus</i> | AF370835  |
| AR 3 | Myriapoda; Diplopoda;<br>Harpagophoridae     | <i>Thyropygus sp.</i>             | NC_003344 |
| AR 4 | Myriapoda; Diplopoda; Spirobolidae           | <i>Narceus annularis</i>          | NC_003343 |
| AR 5 | Chelicerata; Arachnida; Opiliones            | <i>Dalquestia formosa</i>         | AF370833  |
| AR 6 | Chelicerata; Merostomata                     | <i>Limulus polyphemus</i>         | NC_003057 |
| AR 7 | Chelicerata; Merostomata                     | <i>Carcinoscorpius</i>            | AF370828  |

|                 |                                                            |                                                          |           |
|-----------------|------------------------------------------------------------|----------------------------------------------------------|-----------|
| AR 8            | Chelicerata; Arachnida; Scorpiones                         | <i>rotundicauda</i><br><i>Androctonus australis</i>      | AF370829  |
| AR 9            | Hexapoda; Diplura                                          | <i>Campodea tillyardi</i>                                | AF370844  |
| AR 10           | Hexapoda; Epiplura                                         | <i>Tetrodontophora</i><br><i>bielanensis</i>             | NC_002735 |
| AR 11           | Chelicerata; Arachnida; Acari                              | <i>Ixodes hexagonus</i>                                  | NC_002010 |
| AR 12           | Crustacea; Remipedia<br>Myriapoda; Chilopoda;              | <i>Speleonectes gironensis</i>                           | AF370851  |
| AR 13           | Lithobiomorpha                                             | <i>Lithobius forficatus</i>                              | NC_002629 |
| AR 14           | Myriapoda; Symphyla                                        | <i>Hanseniella sp.</i>                                   | AF370839  |
| AR 15           | Hexapoda; Insecta; Orthoptera                              | <i>Locusta migratoria</i>                                | NC_001712 |
| AR 16           | Hexapoda; Insecta; Hemiptera                               | <i>Triatoma dimidiata</i>                                | NC_002609 |
| AR 17           | Hexapoda; Insecta; Coleoptera                              | <i>Tribolium castaneum</i>                               | NC_003081 |
| AR 18           | Hexapoda; Insecta; Lepidoptera                             | <i>Bombyx mori</i>                                       | NC_002355 |
| AR 19           | Hexapoda; Insecta; Thysanura                               | <i>Thermobia domestica</i>                               | AF370848  |
| AR 20           | Crustacea; Branchiopoda                                    | <i>Daphnia pulex</i>                                     | NC_000844 |
| AR 21           | Hexapoda; Insecta; Diptera                                 | <i>Drosophila melanogaster</i>                           | NC_001709 |
| AR 22           | Crustacea; Malacostraca; Decapoda                          | <i>Penaeus monodon</i>                                   | NC_002184 |
| AR 23           | Crustacea; Malacostraca; Euphausiacea                      | <i>Nematoscelis difficilis</i><br><i>Hutchinsoniella</i> | AY047601  |
| AR 24           | Crustacea; Cephalocarida                                   | <i>macracantha</i>                                       | AF370852  |
| AR 25           | Crustacea; Maxillopoda; Copepoda                           | <i>Cletocamptus deitersi</i>                             | AF315009  |
| <b>Test</b>     |                                                            |                                                          |           |
| AR26            | Crustacea; Maxillopoda; Copepoda                           | <i>Calanus pacificus</i>                                 | AF315013  |
| AR27            | Crustacea; Malacostraca; Peracarida                        | <i>Campylaspis affinis</i>                               | AF137515  |
| AR28            | Hexapoda; Insecta; Blattaria                               | <i>Blattella germanica</i><br><i>Crioceris</i>           | S72627    |
| AR29            | Hexapoda; Insecta; Coleoptera                              | <i>duodecimpunctata</i>                                  | NC_003372 |
| AR30            | Hexapoda; Insecta; Lepidoptera                             | <i>Ostrinia furnacalis</i>                               | NC_003368 |
| AR31            | Hexapoda; Insecta; Diptera                                 | <i>Anopheles gambiae</i>                                 | NC_002084 |
| AR32            | Hexapoda; Insecta; Archaeognatha                           | <i>Dilta littoralis</i>                                  | AF370847  |
| AR33            | Crustacea; Branchiopoda; Notostraca                        | <i>Lepidurus sp.</i>                                     | AF209067  |
| AR34            | Crustacea; Malacostraca; Decapoda                          | <i>Homarus americanus</i>                                | AF370853  |
| AR35            | Crustacea; Malacostraca; Decapoda                          | <i>Pagurus longicarpus</i>                               | NC_003058 |
| AR36            | Chelicerata; Arachnida; Acari                              | <i>Rhipicephalus sanguineus</i>                          | NC_002074 |
| AR37            | Chelicerata; Arachnida; Acari                              | <i>Boophilus geigy</i>                                   | AY008680  |
| AR38            | Chelicerata; Arachnida; Opiliones<br>Myriapoda; Chilopoda; | <i>Opilio parietinus</i>                                 | AF370832  |
| AR39            | Lithobiomorpha                                             | <i>Anopsobius neozelanicus</i>                           | AF334313  |
| AR40            | Myriapoda; Diplopoda;                                      | <i>Proteroiulus fuscus</i>                               | AF370842  |
| <b>Mollusca</b> |                                                            |                                                          |           |
| <b>Profile</b>  |                                                            |                                                          |           |
| ML 1            | Cephalopoda; Teuthoida                                     | <i>Loligo bleekeri</i>                                   | NC_002507 |
| ML 2            | Cephalopoda; Teuthoida                                     | <i>Cycloteuthis sirventi</i>                             | AF000036  |
| ML 3            | Cephalopoda; Sepioida                                      | <i>Sepia officinalis</i>                                 | AF120630  |
| ML 4            | Cephalopoda; Octopoda                                      | <i>Octopus californicus</i>                              | AF377968  |
| ML 5            | Cephalopoda; Vampyromorpha                                 | <i>Vampyroteuthis infernalis</i>                         | AF000071  |
| ML 6            | Scaphopoda; Dentaliidae                                    | <i>Dentalium pilsbryi</i>                                | AF120639  |
| ML 7            | Scaphopoda; Rhabdidae                                      | <i>Rhabdus rectius</i>                                   | AF120640  |

|       |                                   |                                |           |
|-------|-----------------------------------|--------------------------------|-----------|
| ML 8  | Bivalvia; Palaeoheterodonta       | <i>Psilunio littoralis</i>     | AF120652  |
| ML 9  | Gastropoda; Archaeogastropoda     | <i>Sinezona confusa</i>        | AF120631  |
| ML 10 | Cephalopoda; Nautilida            | <i>Nautilus pompilius</i>      | AF120628  |
| ML 11 | Polyplacophora; Lepidopleuridae   | <i>Lepidopleurus cajetanus</i> | AF120626  |
| ML 12 | Gastropoda; Archaeogastropoda     | <i>Diodora graeca</i>          | AF120632  |
| ML 13 | Gastropoda; Neritopsina           | <i>Theodoxus fluviatilis</i>   | AF120633  |
| ML 14 | Gastropoda; Caenogastropoda       | <i>Truncatella guerinii</i>    | AF120635  |
| ML 15 | Polyplacophora; Mopaliidae        | <i>Katharina tunicata</i>      | NC_001636 |
| ML 16 | Polyplacophora; Acanthochitonidae | <i>Acanthochitona crinita</i>  | AF120627  |
| ML 17 | Polyplacophora; Chitonidae        | <i>Liolophura japonica</i>     | AB066269  |
| ML 18 | Gastropoda; Opisthobranchia       | <i>Pupa strigosa</i>           | NC_002176 |
| ML 19 | Gastropoda; Pulmonata             | <i>Cepaea nemoralis</i>        | NC_001816 |
| ML 20 | Gastropoda; Pulmonata             | <i>Albinaria coerulea</i>      | NC_001761 |
| ML 21 | Bivalvia; Anomalodesmata          | <i>Cuspidaria cuspidata</i>    | AF120655  |
| ML 22 | Bivalvia; Heteroconchia           | <i>Venerupis philippinarum</i> | NC_003354 |
| ML 23 | Bivalvia; Pteriomorpha            | <i>Lithophaga lithophaga</i>   | AF120644  |
| ML 24 | Bivalvia; Pteriomorpha            | <i>Crassostrea gigas</i>       | NC_001276 |
| ML 25 | Bivalvia; Protobranchia           | <i>Yoldia limatula</i>         | AF120642  |

#### Test

|      |                               |                                  |          |
|------|-------------------------------|----------------------------------|----------|
| ML26 | Bivalvia; Protobranchia       | <i>Nucula proxima</i>            | AF120641 |
| ML27 | Cephalopoda; Teuthoidea       | <i>Loligo pealei</i>             | AF120629 |
| ML28 | Cephalopoda; Sepioida         | <i>Heteroteuthis hawaiiensis</i> | AF000044 |
| ML29 | Cephalopoda; Octopoda         | <i>Megaleledone senoi</i>        | AF377977 |
| ML30 | Bivalvia; Palaeoheterodonta   | <i>Lampsilis cardium</i>         | AF120653 |
| ML31 | Gastropoda; Caenogastropoda   | <i>Balcis eburnea</i>            | AF120636 |
| ML32 | Gastropoda; Archaeogastropoda | <i>Tegula viridula</i>           | AF132340 |
| ML33 | Gastropoda; Caenogastropoda   | <i>Viviparus georgianus</i>      | AF120634 |
| ML34 | Polyplacophora; Chitonidae    | <i>Acanthopleura loochooana</i>  | AB066223 |
| ML35 | Polyplacophora; Chitonidae    | <i>Acanthopleura gemmata</i>     | AB066222 |
| ML36 | Gastropoda; Opisthobranchia   | <i>Peltodoris atromaculata</i>   | AF120637 |
| ML37 | Gastropoda; Pulmonata         | <i>Siphonaria pectinata</i>      | AF120638 |
| ML38 | Bivalvia; Heteroconchia       | <i>Chama gryphoides</i>          | AF120656 |
| ML39 | Bivalvia; Anomalodesmata      | <i>Lyonsia floridana</i>         | AF120654 |
| ML40 | Bivalvia; Pteriomorpha        | <i>Lima lima</i>                 | AF120649 |

#### Echinodermata

##### Profile

|       |                              |                                  |           |
|-------|------------------------------|----------------------------------|-----------|
| EC 1  | Echinoidea; Arbaciidae       | <i>Arbacia lixula</i>            | NC_001770 |
| EC 2  | Echinoidea; Echinidae        | <i>Paracentrotus lividus</i>     | NC_001572 |
| EC 3  | Crinoidea; Antedonidae       | <i>Florometra serratissima</i>   | NC_001878 |
| EC 4  | Holothuroidea; Synallactidae | <i>Pseudostichopus mollis</i>    | U32221    |
| EC 5  | Holothuroidea; Psolidae      | <i>Psolus chitonoides</i>        | U32220    |
| EC 6  | Holothuroidea; Cucumariidae  | <i>Cucumaria miniata</i>         | AF009350  |
| EC 7  | Asteroidea ; Luidiidae       | <i>Luidia foliolata</i>          | AF217380  |
| EC 8  | Asteroidea ; Goniasteridae   | <i>Mediaster aequalis</i>        | AF217385  |
| EC 9  | Asteroidea; Asterinidae      | <i>Asterina pectinifera</i>      | NC_001627 |
| EC 10 | Asteroidea ; Labidiasteridae | <i>Rathbunaster californicus</i> | AF217387  |

#### Test

|      |                           |                            |          |
|------|---------------------------|----------------------------|----------|
| EC11 | Asteroidea ; Solasteridae | <i>Crossaster papposus</i> | AF217383 |
|------|---------------------------|----------------------------|----------|

|      |                                  |                                      |           |
|------|----------------------------------|--------------------------------------|-----------|
| EC12 | Holothuroidea; Stichopodidae     | <i>Parastichopus parvimensis</i>     | U32199    |
| EC13 | Holothuroidea; Phyllophoridae    | <i>Pentamera lissoplaca</i>          | U32219    |
| EC14 | Asteroidea ; Brisingidae         | <i>Brisingaster robillardi</i>       | AF217392  |
| EC15 | Echinoidea; Strongylocentrotidae | <i>Strongylocentrotus purpuratus</i> | NC_001453 |

## APPENDIX B:

| Order                    | Family                    | Species                        | Accession Number     |
|--------------------------|---------------------------|--------------------------------|----------------------|
| Lepidoptera<br>(Profile) | Geometridae               | <i>Lambdina fiscellaria</i>    | AF064521             |
|                          | Arctiidae                 | <i>Halysidota tessellaris</i>  | AY165683             |
|                          | Nolidae                   | <i>Nola triquetrana</i>        | AY165692             |
|                          | Notodontidae              | <i>Heterocampa umbrata</i>     | AF549793             |
|                          | Noctuidae                 | <i>Feltia jaculifera</i>       | U60990               |
|                          | Lymantridae               | <i>Dasychira dorsipennata</i>  | AY165695             |
|                          | Lasiocampidae             | <i>Phyllodesma americana</i>   | AY165690             |
|                          |                           | <i>Calledapteryx</i>           |                      |
|                          | Uraniidae                 | <i>dryopterata</i>             | AY165694             |
|                          | Bombycidae                | <i>Bombyx mori</i>             | NC002355             |
|                          | Drepanidae                | <i>Drepana bilineata</i>       | AY165691             |
|                          | Sphingidae                | <i>Proserpinus clarkiae</i>    | AF170855             |
|                          | Nymphalidae               | <i>Boloria epithone</i>        | AF170862             |
|                          | Lycaenidae                | <i>Euphilotes bernardino</i>   | AF170864             |
|                          | Saturniidae               | <i>Hemileuca electra</i>       | AF170856             |
|                          | Thyatiridae               | <i>Habrosyne scripta</i>       | AY165703             |
|                          | Riodinidae                | <i>Apodemia mormo</i>          | AF170863             |
|                          | Ceratocampidae            | <i>Anisota rubicunda</i>       | AY165693             |
|                          | Pyalidae                  | <i>Ostrinia nubilalis</i>      | AF170853             |
|                          | Satyridae                 | <i>Coenonympha tullia</i>      | AF170860             |
|                          | Cossidae                  | <i>Acosus centerensis</i>      | AY165631             |
|                          | Pieridae                  | <i>Colias eurytheme</i>        | AF044024             |
|                          | Papilionidae              | <i>Papilio constantinus</i>    | AF044002             |
|                          | Limacodidae               | <i>Euclea delphinii</i>        | AY165632             |
|                          | Hepialidae                | <i>Korscheltellus lupulina</i> | AF549607             |
|                          | (Test)                    | Arctiidae                      | <i>Cycnia tenera</i> |
| Arctiidae                |                           | <i>Hyphantria cunea</i>        | AY165723             |
| Drepanidae               |                           | <i>Drepana arcuata</i>         | AY165719             |
|                          |                           | <i>Hydriomena</i>              |                      |
| Geometridae              |                           | <i>transfigurata</i>           | AF549638             |
| Geometridae              |                           | <i>Pero honestaria</i>         | AY165722             |
|                          |                           | <i>Prochoerodes</i>            |                      |
| Geometridae              |                           | <i>transversata</i>            | AF549685             |
| Noctuidae                |                           | <i>Feralia major</i>           | AF549687             |
|                          |                           | <i>Phalaenostola</i>           |                      |
| Noctuidae                | <i>larentioides</i>       | AF549769                       |                      |
| Notodontidae             | <i>Peridea basitriens</i> | AF549791                       |                      |

|                         |                |                                                 |          |
|-------------------------|----------------|-------------------------------------------------|----------|
|                         | Pyrilidae      | <i>Desmia funeralis</i>                         | AY165724 |
|                         | Saturniidae    | <i>Hyalophora cecropia</i>                      | AY165720 |
|                         | Sphingidae     | <i>Lapara bombycoides</i>                       | AF549802 |
| Coleoptera<br>(Profile) | Pedilidae      | <i>Pedilus sp.</i>                              | AY165670 |
|                         | Cerambycidae   | <i>Typocerus velutinus</i>                      | AY165677 |
|                         | Melandryidae   | <i>Melandrya striata</i>                        | AY165673 |
|                         | Tenebrionidae  | <i>Tribolium cataneum</i><br><i>Crioceris</i>   | NC003081 |
|                         | Chrysomelidae  | <i>duodecimpunctata</i>                         | NC003372 |
|                         | Melyridae      | <i>Collops sp.</i>                              | AY165674 |
|                         | Lampyridae     | <i>Photurus pennsylvanica</i>                   | AY165656 |
|                         | Cantharidae    | <i>Rhagonycha fulva</i>                         | AY165676 |
|                         | Curculionidae  | <i>Otiorhynchus raucus</i>                      | AY165668 |
|                         | Scolytidae     | <i>Scolytus sp.</i>                             | AY165681 |
|                         | Coccinellidae  | <i>Harmonia axyridis</i>                        | AY165684 |
|                         | Silphidae      | <i>Necrophila americana</i>                     | AY165669 |
|                         | Dermestidae    | <i>Anthrenus sp.</i>                            | AY165779 |
|                         | Scarabaeidae   | <i>Amphimallon majalis</i>                      | AY165642 |
|                         | Lucanidae      | <i>Ceruchus piceus</i><br><i>Philonthus</i>     | AY165672 |
|                         | Staphylinidae  | <i>caeruleipennis</i>                           | AY165678 |
|                         | Elateridae     | <i>Ctenicera mediana</i>                        | AY165675 |
|                         | Buprestidae    | <i>Dicerca divaricata</i>                       | AY165645 |
|                         | Heteroceridae  | <i>Heterocerus sp.</i>                          | AY165682 |
|                         | Elmidae        | <i>Stenelmis sp.</i>                            | AY165649 |
|                         | Psephenidae    | <i>Psephenus herricki</i>                       | AY165680 |
|                         | Cicindellidae  | <i>Cicindela sexguttata</i>                     | AY165643 |
|                         | Carabidae      | <i>Pterostichus mutus</i>                       | AY165644 |
|                         | Dytiscidae     | <i>Laccophilus sp.</i>                          | AY165648 |
|                         | Gyrinidae      | <i>Gyrinus sp.</i>                              | AY165671 |
| (Test)                  | Cerambycidae   | <i>Judolia montivagans</i>                      | AY165712 |
|                         | Lycidae        | <i>Caenia dimidiata</i><br><i>Leptinotarsa</i>  | AY165730 |
|                         | Chrysomellidae | <i>decemlineata</i>                             | AY165708 |
|                         | Dermestidae    | <i>Dermestes lardarius</i>                      | AY165734 |
|                         | Scarabaeidae   | <i>Trox unistriatus</i><br><i>Hemicrepidius</i> | AY165707 |
|                         | Elateridae     | <i>memnonius</i>                                | AY165705 |
|                         | Chrysomellidae | <i>Chrysolina sp.</i>                           | AY165716 |
|                         | Chrysomellidae | <i>Chrysochus auratus</i>                       | AY165728 |
|                         | Cicindellidae  | <i>Cicindela punctulata</i>                     | AY165729 |
|                         | Lampyridae     | <i>Pyraclonema sp.</i>                          | AY165715 |
|                         | Lampyridae     | <i>Pyrocoelia rufa</i>                          | NC003970 |
|                         | Scolytidae     | <i>Dendroctonus jeffreyi</i>                    | AF067994 |
| Hymenoptera             | Sphecidae      | <i>Ammophila sp.</i>                            | AF146683 |

|                         |                  |                               |          |
|-------------------------|------------------|-------------------------------|----------|
| (Profile)               | Gasteruptionidae | <i>Gasteruption sp.</i>       | AF146676 |
|                         | Ichneumonidae    | <i>Pimpla aequalis</i>        | AF146681 |
|                         | Chrysididae      | <i>Stilbum sp.</i>            | AY165696 |
|                         | Formicidae       | <i>Formica fusca</i>          | AB010925 |
|                         | Tiphiidae        | <i>Myrmosa sp.</i>            | AY165665 |
|                         | Braconidae       | <i>Chelonus sp.</i>           | AY165727 |
|                         | Vespidae         | <i>Polistes fuscatus</i>      | AY165664 |
|                         | Halictidae       | <i>Augochlorella sp.</i>      | AY165666 |
|                         | Apidae           | <i>Apis mellifera</i>         | NC001566 |
|                         | Anthophoridae    | <i>Xylocopa sp.</i>           | AY165667 |
| (Test)                  | Formicidae       | <i>Oecophylla smaragdina</i>  | AY165697 |
|                         | Apidae           | <i>Bombus sp.</i>             | AY165702 |
|                         | Megachilidae     | <i>Osmia taurus</i>           | AF250939 |
| Diptera<br>(Profile)    | Ptychopteridae   | <i>Bittacomorpha clavipes</i> | AY165638 |
|                         | Simuliidae       | <i>Simulium venustum</i>      | AY165663 |
|                         | Bombyliidae      | <i>Bombylius validus</i>      | AY165655 |
|                         | Tabanidae        | <i>Chrysops sp.</i>           | AY165640 |
|                         | Pelecorhynchidae | <i>Glutops rossi</i>          | AY165651 |
|                         | Athericidae      | <i>Atherix sp.</i>            | AY165650 |
|                         | Rhagionidae      | <i>Symphoromyia sp.</i>       | AY165652 |
|                         | Syrphidae        | <i>Scaeva pyrastris</i>       | AY165733 |
|                         | Tipulidae        | <i>Tipula sp.</i>             | AY165639 |
|                         | Culicidae        | <i>Anopheles gambiae</i>      | NC002084 |
|                         | Asilidae         | <i>Efferia aestuans</i>       | AY165641 |
|                         | Tephritidae      | <i>Ceratitis capitata</i>     | NC000857 |
|                         | Sphaeroceridae   | <i>Sphaerocera curvipes</i>   | AY165653 |
|                         | Drosophilidae    | <i>Drosophila yakuba</i>      | NC001322 |
|                         | Calliphoridae    | <i>Phormia regina</i>         | AF295550 |
| (Test)                  | Empidae          | <i>Empis sp.</i>              | AY165709 |
|                         | Asilidae         | <i>Asilus sp.</i>             | AY165713 |
|                         | Rhagionidae      | <i>Chryopilus sp.</i>         | AY165706 |
|                         | Stratiomyidae    | <i>Stratiomys sp.</i>         | AY165721 |
|                         | Syrphidae        | <i>Chrysotoxum sp.</i>        | AY165714 |
|                         | Heliomyzidae     | <i>Suillia sp.</i>            | AY165737 |
|                         | Asilidae         | <i>Lasiopogon sp.</i>         | AY165732 |
|                         | Xylomyidae       | <i>Macroceromys sp.</i>       | AY165711 |
|                         | Xylophagidae     | <i>Xylophagus sp.</i>         | AY165704 |
|                         |                  | <i>Scathophaga</i>            |          |
|                         | Scathophagidae   | <i>stercoraria</i>            | AY165710 |
|                         | Pyrgotidae       | <i>Sphecomyiella valida</i>   | AY165717 |
|                         | Bombyliidae      | <i>Anthrax sp.</i>            | AY165731 |
|                         | Calliphoridae    | <i>Chrysoma chloropyga</i>    | NC002967 |
| Orthoptera<br>(Profile) | Gryllidae        | <i>Gryllus pennsylvanicus</i> | AY165657 |
|                         | Tettigoniidae    | <i>Orchelimum gladiator</i>   | AY165738 |

|                            |                 |                                  |                                 |          |
|----------------------------|-----------------|----------------------------------|---------------------------------|----------|
|                            | Gryllotalpidae  | <i>Gryllotalpa sp.</i>           | AY165658                        |          |
|                            | Eumastacidae    | <i>Warramunga sp.</i>            | AY165630                        |          |
|                            | Acrididae       | <i>Locusta migratoria</i>        | NC001712                        |          |
| (Test)                     | Acrididae       | <i>Chorohippes parallelus</i>    | X95574                          |          |
| Plecoptera<br>(Profile)    | Leuctridae      | <i>Leuctra sp.</i>               | AY165660                        |          |
|                            | Capniidae       | <i>Allocapnia sp.</i>            | AY165662                        |          |
|                            | Notonemouridae  | <i>Aphanicerca capensis</i>      | AY058904                        |          |
|                            | Peltoperlidae   | <i>Peltoperla arcuata</i>        | AY165654                        |          |
|                            | Perlidae        | <i>Acroneuria carolinensis</i>   | AY165629                        |          |
|                            | Chloroperlidae  | <i>Sweltsa sp.</i>               | AY165659                        |          |
| (Test)                     | Perlodidae      | <i>Isogenoides frontalis</i>     | AY165725                        |          |
|                            | Perlodidae      | <i>Megarcys signata</i>          | AY165726                        |          |
| Blattaria<br>(Profile)     | Blattellidae    | <i>Blatella germanica</i>        | S72627                          |          |
|                            | Cryptocercidae  | <i>Cryptocercus sp.</i>          | AY165647                        |          |
|                            | Blattidae       | <i>Periplaneta americana</i>     | AY165646                        |          |
|                            |                 | <i>Gromphadorhina portentosa</i> | AY165661                        |          |
| (Test)                     | Blattellidae    | <i>Parcoblatta pennsylvanica</i> | AY165718                        |          |
| Ephemeroptera<br>(Profile) | Baetiscidae     | <i>Baetisca laurentina</i>       | AY165636                        |          |
|                            | Caenidae        | <i>Caenis sp.</i>                | AY165689                        |          |
|                            | Ameletidae      | <i>Ameletus lineatus</i>         | AY165637                        |          |
|                            | Ephemerellidae  | <i>Ephemerella invaria</i>       | AY165635                        |          |
|                            | Ephemeridae     | <i>Ephemerella simulans</i>      | AY165685                        |          |
|                            |                 | <i>Leptophlebia intermedia</i>   | AY165686                        |          |
|                            | Leptophlebiidae | <i>Siphonurus quebecensis</i>    | AY165633                        |          |
|                            | Siphonuridae    | <i>Metretopus borealis</i>       | AY165687                        |          |
|                            | Metretopodidae  | <i>Stenonema femoratum</i>       | AY165634                        |          |
|                            | Heptageniidae   | <i>Isonychia sp.</i>             | AY165688                        |          |
|                            | (Test)          | Ameletidae                       | <i>Ameletus andersoni</i>       | AY165698 |
|                            |                 |                                  | <i>Eurylophella prudentalis</i> | AY165736 |
|                            |                 | Ephemerellidae                   | <i>Hexagenia c.f. rigida</i>    | AY165699 |
| Ephemeridae                |                 | <i>Heptagenia adaequata</i>      | AY165700                        |          |
| Heptageniidae              |                 | <i>Leptophlebia nebulosa</i>     | AY165701                        |          |
| Leptophlebiidae            |                 | <i>Nesameletus wainuimetea</i>   | AY165735                        |          |
| Ameletidae                 |                 |                                  |                                 |          |



APPENDIX C:

| <b>Family</b>                           | <b>Species</b>                 | <b>GenBank<br/>Accession #</b> |
|-----------------------------------------|--------------------------------|--------------------------------|
| Arctiidae                               | <i>Cisseps fulvicollis</i>     | AF549624                       |
|                                         | <i>Ctenucha virginica</i>      | AF549625                       |
|                                         | <i>Cycnia oregonensis</i>      | AF549610                       |
|                                         | <i>Cycnia tenera</i>           | AF549611                       |
|                                         | <i>Euchaetes egle</i>          | AF549609                       |
|                                         | <i>Grammia arge</i>            | AF549622                       |
|                                         | <i>Grammia virgo</i>           | AF549621                       |
|                                         | <i>Grammia virguncula</i>      | AF549620                       |
|                                         | <i>Halysidota tessellaris</i>  | AF549613                       |
|                                         | <i>Haploa confusa</i>          | AF549616                       |
|                                         | <i>Hyphantria cunea</i>        | AF549608                       |
|                                         | <i>Hypoprepia fucosa</i>       | AF549615                       |
|                                         | <i>Hypoprepia miniata</i>      | AF549614                       |
|                                         | <i>Lophocampa maculata</i>     | AF549612                       |
|                                         | <i>Phragmatobia fuliginosa</i> | AF549623                       |
|                                         | <i>Pyrrharctia isabella</i>    | AF549617                       |
|                                         | <i>Spilosoma congrua</i>       | AF549619                       |
|                                         | <i>Spilosoma virginica</i>     | AF549618                       |
|                                         | Geometridae                    | <i>Aethalura intertexta</i>    |
| <i>Anacamptodes<br/>vellivolata</i>     |                                | AF549678                       |
| <i>Anavitrinella pampinaria</i>         |                                | AF549654                       |
| <i>Besma quercivoraria</i>              |                                | AF549675                       |
| <i>Biston betularia</i>                 |                                | AF549663                       |
| <i>Campaea perlata</i>                  |                                | AF549649                       |
| <i>Caripeta divisata</i>                |                                | AF549633                       |
| <i>Cepphis armataria</i>                |                                | AF549634                       |
| <i>Cepphis decoloraria</i>              |                                | AF549635                       |
| <i>Chlorochlamys<br/>chloroleucaria</i> |                                | AF549645                       |
| <i>Chloroclysta hersiliata</i>          |                                | AF549684                       |
| <i>Cladara limitaria</i>                |                                | AF549648                       |
| <i>Cyclophora pendulinaria</i>          |                                | AF549653                       |
| <i>Dyspteris abortivaria</i>            |                                | AF549686                       |
| <i>Ennomos subsignaria</i>              |                                | AF549628                       |
| <i>Euchlaena johnsonaria</i>            |                                | AF549676                       |
| <i>Eulithis diversilineata</i>          |                                | AF549682                       |
| <i>Eulithis molliculata</i>             |                                | AF549683                       |
| <i>Eumacaria latiferrugata</i>          |                                | AF549666                       |
| <i>Euphyia unangulata</i>               |                                | AF549639                       |
| <i>Eupithecia annulata</i>              |                                | AF549656                       |
| <i>Eupithecia assimilata</i>            |                                | AF549658                       |

|            |                                 |          |
|------------|---------------------------------|----------|
|            | <i>Eupithecia mutata</i>        | AF549660 |
|            | <i>Eupithecia palpata</i>       | AF549655 |
|            | <i>Eupithecia</i>               |          |
|            | <i>ravocostaliata</i>           | AF549657 |
|            | <i>Eupithecia subfuscata</i>    | AF549659 |
|            | <i>Eutrapela clemataria</i>     | AF549626 |
|            | <i>Heterophleps triguttaria</i> | AF549674 |
|            | <i>Hydriomena perfracta</i>     | AF549661 |
|            | <i>Hydriomena</i>               |          |
|            | <i>transfigurata</i>            | AF549638 |
|            | <i>Itame pustularia</i>         | AF549652 |
|            | <i>Lobophora nivigerata</i>     | AF549636 |
|            | <i>Lomographa vestaliata</i>    | AF549637 |
|            | <i>Lytrosis unitaria</i>        | AF549681 |
|            | <i>Melanolophia canadaria</i>   | AF549668 |
|            | <i>Melanolophia signataria</i>  | AF549664 |
|            | <i>Metanema inatomaria</i>      | AF549677 |
|            | <i>Metarranthis indeclinata</i> | AF549631 |
|            | <i>Nemoria mimosaria</i>        | AF549679 |
|            | <i>Nemoria rubrifrontaria</i>   | AF549647 |
|            | <i>Orthonama</i>                |          |
|            | <i>centrostrigaria</i>          | AF549643 |
|            | <i>Orthonama obstipata</i>      | AF549642 |
|            | <i>Pero honestaria</i>          | AF549630 |
|            | <i>Pero morrisonaria</i>        | AF549629 |
|            | <i>Plagodis phlogosaria</i>     | AF549640 |
|            | <i>Prochoerodes</i>             |          |
|            | <i>transversata</i>             | AF549685 |
|            | <i>Scopula inductata</i>        | AF549651 |
|            | <i>Scopula limboundata</i>      | AF549650 |
|            | <i>Semiothisa aemulataria</i>   | AF549673 |
|            | <i>Semiothisa bisignata</i>     | AF549672 |
|            | <i>Semiothisa granitata</i>     | AF549669 |
|            | <i>Semiothisa minorata</i>      | AF549670 |
|            | <i>Semiothisa orillata</i>      | AF549667 |
|            | <i>Semiothisa</i>               |          |
|            | <i>submarmorata</i>             | AF549671 |
|            | <i>Synchlora aerata</i>         | AF549646 |
|            | <i>Tetracis cachexiata</i>      | AF549627 |
|            | <i>Trichodezia albovittata</i>  | AF549662 |
|            | <i>Xanthorhoe ferrugata</i>     | AF549641 |
|            | <i>Xanthorhoe munitata</i>      | AF549665 |
|            | <i>Xanthorhoe packardata</i>    | AF549644 |
|            | <i>Xanthotype urticaria</i>     | AF549632 |
| Hepialidae | <i>Korscheltellus lupulina</i>  | AF549607 |
| Noctuidae  | <i>Acronicta dactylina</i>      | AF549746 |
|            | <i>Acronicta hasta</i>          | AF549730 |
|            | <i>Acronicta impressa</i>       | AF549729 |
|            | <i>Acronicta lepusculina</i>    | AF549728 |
|            | <i>Acronicta morula</i>         | AF549731 |

|                                |          |
|--------------------------------|----------|
| <i>Agrotis ipsilon</i>         | AF549736 |
| <i>Agrotis volubilis</i>       | AF549702 |
| <i>Allagrapha aerea</i>        | AF549755 |
| <i>Amolita fessa</i>           | AF549771 |
| <i>Anaplectoides prasina</i>   | AF549765 |
| <i>Apamea devastator</i>       | AF549774 |
| <i>Apamea lignicolora</i>      | AF549764 |
| <i>Baileya ophthalmica</i>     | AF549760 |
| <i>Balsa labecula</i>          | AF549712 |
| <i>Balsa tristigella</i>       | AF549750 |
| <i>Caenurgina crassiuscula</i> | AF549721 |
| <i>Calophasia lunula</i>       | AF549705 |
| <i>Catocala crataegi</i>       | AF549770 |
| <i>Catocala praeclara</i>      | AF549737 |
| <i>Cerma cerintha</i>          | AF549745 |
| <i>Charadra deridens</i>       | AF549748 |
| <i>Colocasia</i>               |          |
| <i>propinquilinea</i>          | AF549699 |
| <i>Condica videns</i>          | AF549768 |
| <i>Copivaleria grotei</i>      | AF549754 |
| <i>Crocigrapha normani</i>     | AF549726 |
| <i>Cucullia intermedia</i>     | AF549704 |
| <i>Diachrysia aereoides</i>    | AF549732 |
| <i>Dyspyralis nigella</i>      | AF549710 |
| <i>Egira dolosa</i>            | AF549693 |
| <i>Eudryas grata</i>           | AF549701 |
| <i>Eupsilia morrisoni</i>      | AF549696 |
| <i>Faronta diffusa</i>         | AF549716 |
| <i>Feltia tricola</i>          | AF549766 |
| <i>Feralia comstocki</i>       | AF549688 |
| <i>Feralia jocosa</i>          | AF549689 |
| <i>Feralia major</i>           | AF549687 |
| <i>Galgula partita</i>         | AF549719 |
| <i>Hydraecia micacea</i>       | AF549775 |
| <i>Hypena humuli</i>           | AF549743 |
| <i>Hyppa xylinoides</i>        | AF549692 |
| <i>Idia americalis</i>         | AF549723 |
| <i>Idia concisa</i>            | AF549761 |
| <i>Lacinipolia lorea</i>       | AF549758 |
| <i>Lacinipolia renigera</i>    | AF549739 |
| <i>Lascoria ambigualis</i>     | AF549734 |
| <i>Leucania inermis</i>        | AF549772 |
| <i>Leuconycta diphteroides</i> | AF549720 |
| <i>Lithacodia albidula</i>     | AF549756 |
| <i>Lithophane innominata</i>   | AF549744 |
| <i>Marathyssa inficita</i>     | AF549724 |
| <i>Megalographa biloba</i>     | AF549706 |
| <i>Meganola minuscula</i>      | AF549759 |
| <i>Melanchra adjuncta</i>      | AF549690 |
| <i>Melanchra assimilis</i>     | AF549691 |
| <i>Morrisonia confusa</i>      | AF549708 |
| <i>Morrisonia evicta</i>       | AF549707 |

|              |                                 |          |
|--------------|---------------------------------|----------|
|              | <i>Nedra ramosula</i>           | AF549711 |
|              | <i>Noctua pronuba</i>           | AF549752 |
|              | <i>Nola triquetrana</i>         | AF549776 |
|              | <i>Ochropleura implecta</i>     | AF549751 |
|              | <i>Oligia subjuncta</i>         | AF549763 |
|              | <i>Orthodes cynica</i>          | AF549733 |
|              | <i>Orthosia alurina</i>         | AF549703 |
|              | <i>Orthosia hibisci</i>         | AF549725 |
|              | <i>Orthosia revicta</i>         | AF549727 |
|              | <i>Orthosia rubescens</i>       | AF549695 |
|              | <i>Palthis angulalis</i>        | AF549722 |
|              | <i>Panopoda carneicosta</i>     | AF549767 |
|              | <i>Panthea pallescens</i>       | AF549697 |
|              | <i>Phalaenostola</i>            |          |
|              | <i>larentioides</i>             | AF549769 |
|              | <i>Polia imbrifera</i>          | AF549735 |
|              | <i>Polia purpurissata</i>       | AF549753 |
|              | <i>Protorthodes oviduca</i>     | AF549694 |
|              | <i>Proxenus miranda</i>         | AF549757 |
|              | <i>Pseudaletia unipuncta</i>    | AF549698 |
|              | <i>Pseudorthodes vecors</i>     | AF549762 |
|              | <i>Pseudostrotia carneola</i>   | AF549718 |
|              | <i>Raphia frater</i>            | AF549747 |
|              | <i>Renia flavipunctalis</i>     | AF549741 |
|              | <i>Rivula propinqualis</i>      | AF549749 |
|              | <i>Schinia florida</i>          | AF549738 |
|              | <i>Simyra henrici</i>           | AF549709 |
|              | <i>Spaelotis clandestina</i>    | AF549773 |
|              | <i>Tarachidia erastrionides</i> | AF549717 |
|              | <i>Tricholita signata</i>       | AF549740 |
|              | <i>Xylena curvimacula</i>       | AF549700 |
|              | <i>Zale duplicata</i>           | AF549714 |
|              | <i>Zale sp.nov.</i>             | AF549713 |
|              | <i>Zale unilineata</i>          | AF549715 |
|              | <i>Zanclognatha</i>             |          |
|              | <i>protumnusalis</i>            | AF549742 |
| Notodontidae | <i>Clostera albosigma</i>       | AF549781 |
|              | <i>Clostera apicalis</i>        | AF549782 |
|              | <i>Datana ministra</i>          | AF549792 |
|              | <i>Ellida caniplaga</i>         | AF549779 |
|              | <i>Furcula borealis</i>         | AF549785 |
|              | <i>Furcula cinerea</i>          | AF549786 |
|              | <i>Furcula modesta</i>          | AF549787 |
|              | <i>Gluphisia lintneri</i>       | AF549780 |
|              | <i>Heterocampa biundata</i>     | AF549778 |
|              | <i>Heterocampa guttivitta</i>   | AF549784 |
|              | <i>Heterocampa umbrata</i>      | AF549793 |
|              | <i>Lochmaeus manteo</i>         | AF549795 |
|              | <i>Nadata gibbosa</i>           | AF549788 |
|              | <i>Notodonta simplaria</i>      | AF549783 |
|              | <i>Odontosia elegans</i>        | AF549789 |

|            |                               |          |
|------------|-------------------------------|----------|
|            | <i>Peridea basitriens</i>     | AF549791 |
|            | <i>Pheosia rimosa</i>         | AF549777 |
|            | <i>Schizura badia</i>         | AF549794 |
|            | <i>Schizura unicornis</i>     | AF549790 |
|            | <i>Symmerista leucitys</i>    | AF549796 |
| Sphingidae | <i>Ceratonia undulosa</i>     | AF549807 |
|            | <i>Deidamia inscripta</i>     | AF549805 |
|            | <i>Lapara bombycoides</i>     | AF549802 |
|            | <i>Pachysphinx modesta</i>    | AF549803 |
|            | <i>Paonias excaecatus</i>     | AF549800 |
|            | <i>Paonias myops</i>          | AF549798 |
|            | <i>Smerinthus cerisyi</i>     | AF549799 |
|            | <i>Smerinthus jamaicensis</i> | AF549797 |
|            | <i>Sphecodina abbottii</i>    | AF549804 |
|            | <i>Sphinx canadensis</i>      | AF549806 |
|            | <i>Sphinx poecila</i>         | AF549801 |

APPENDIX D

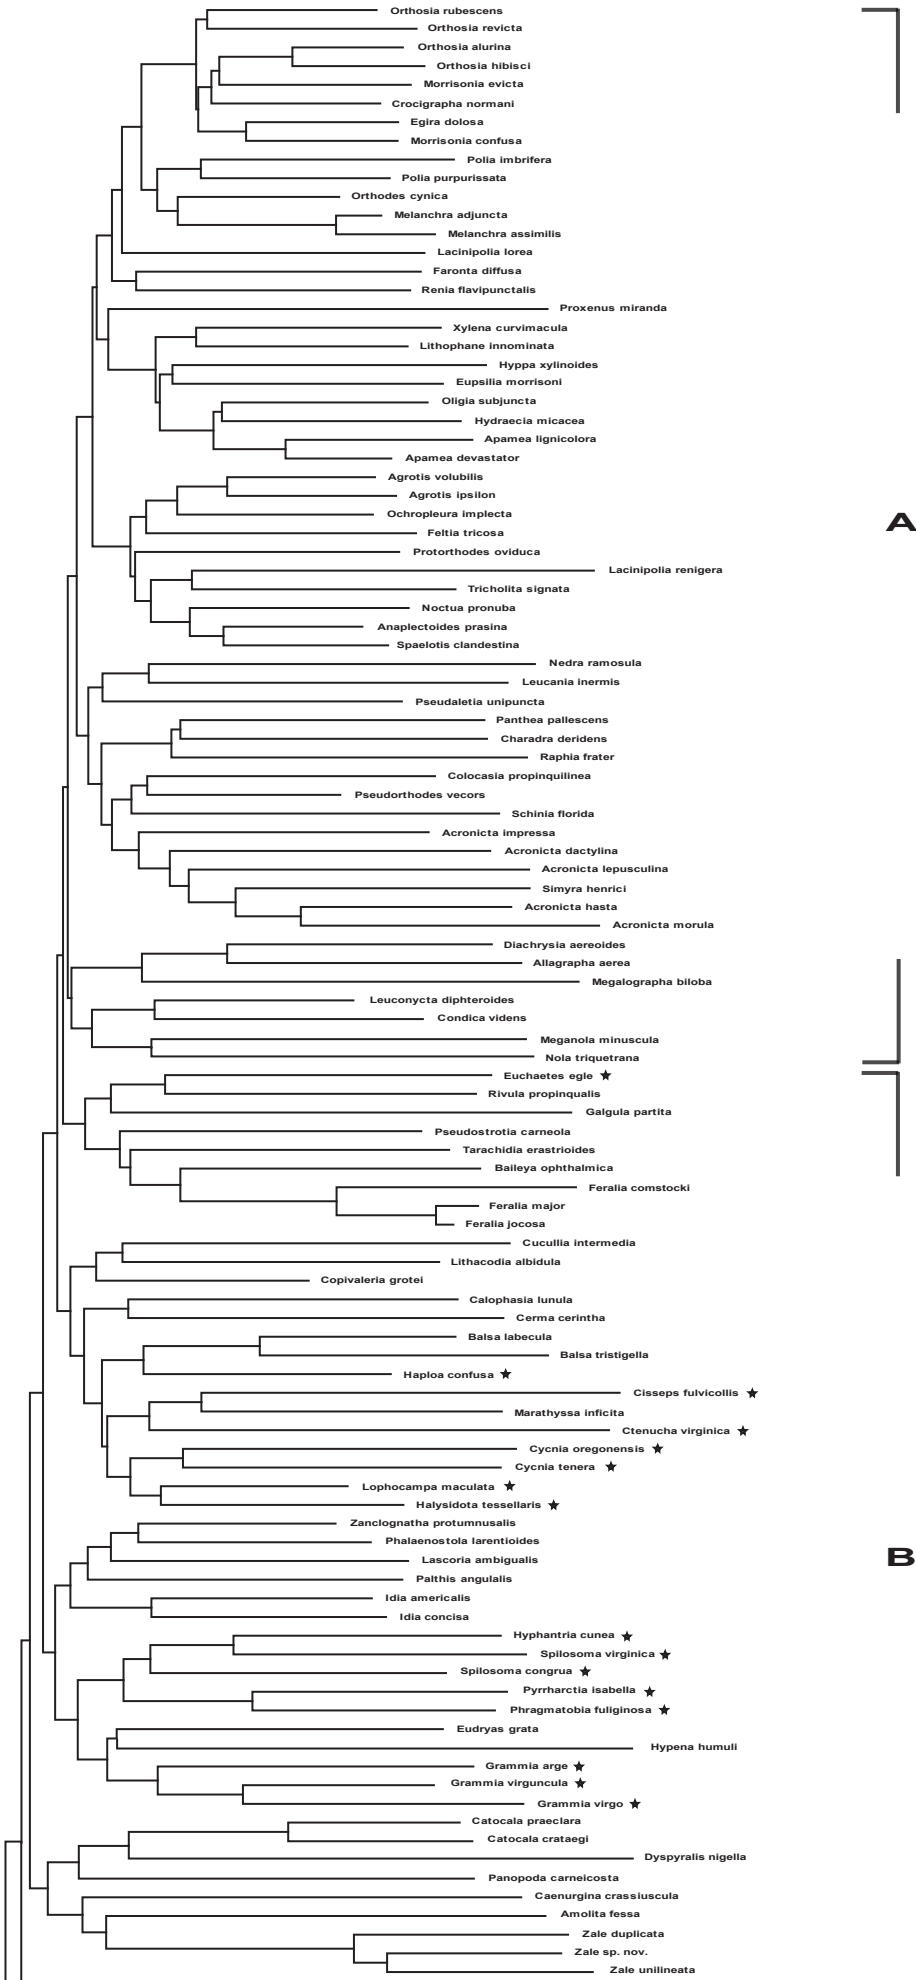

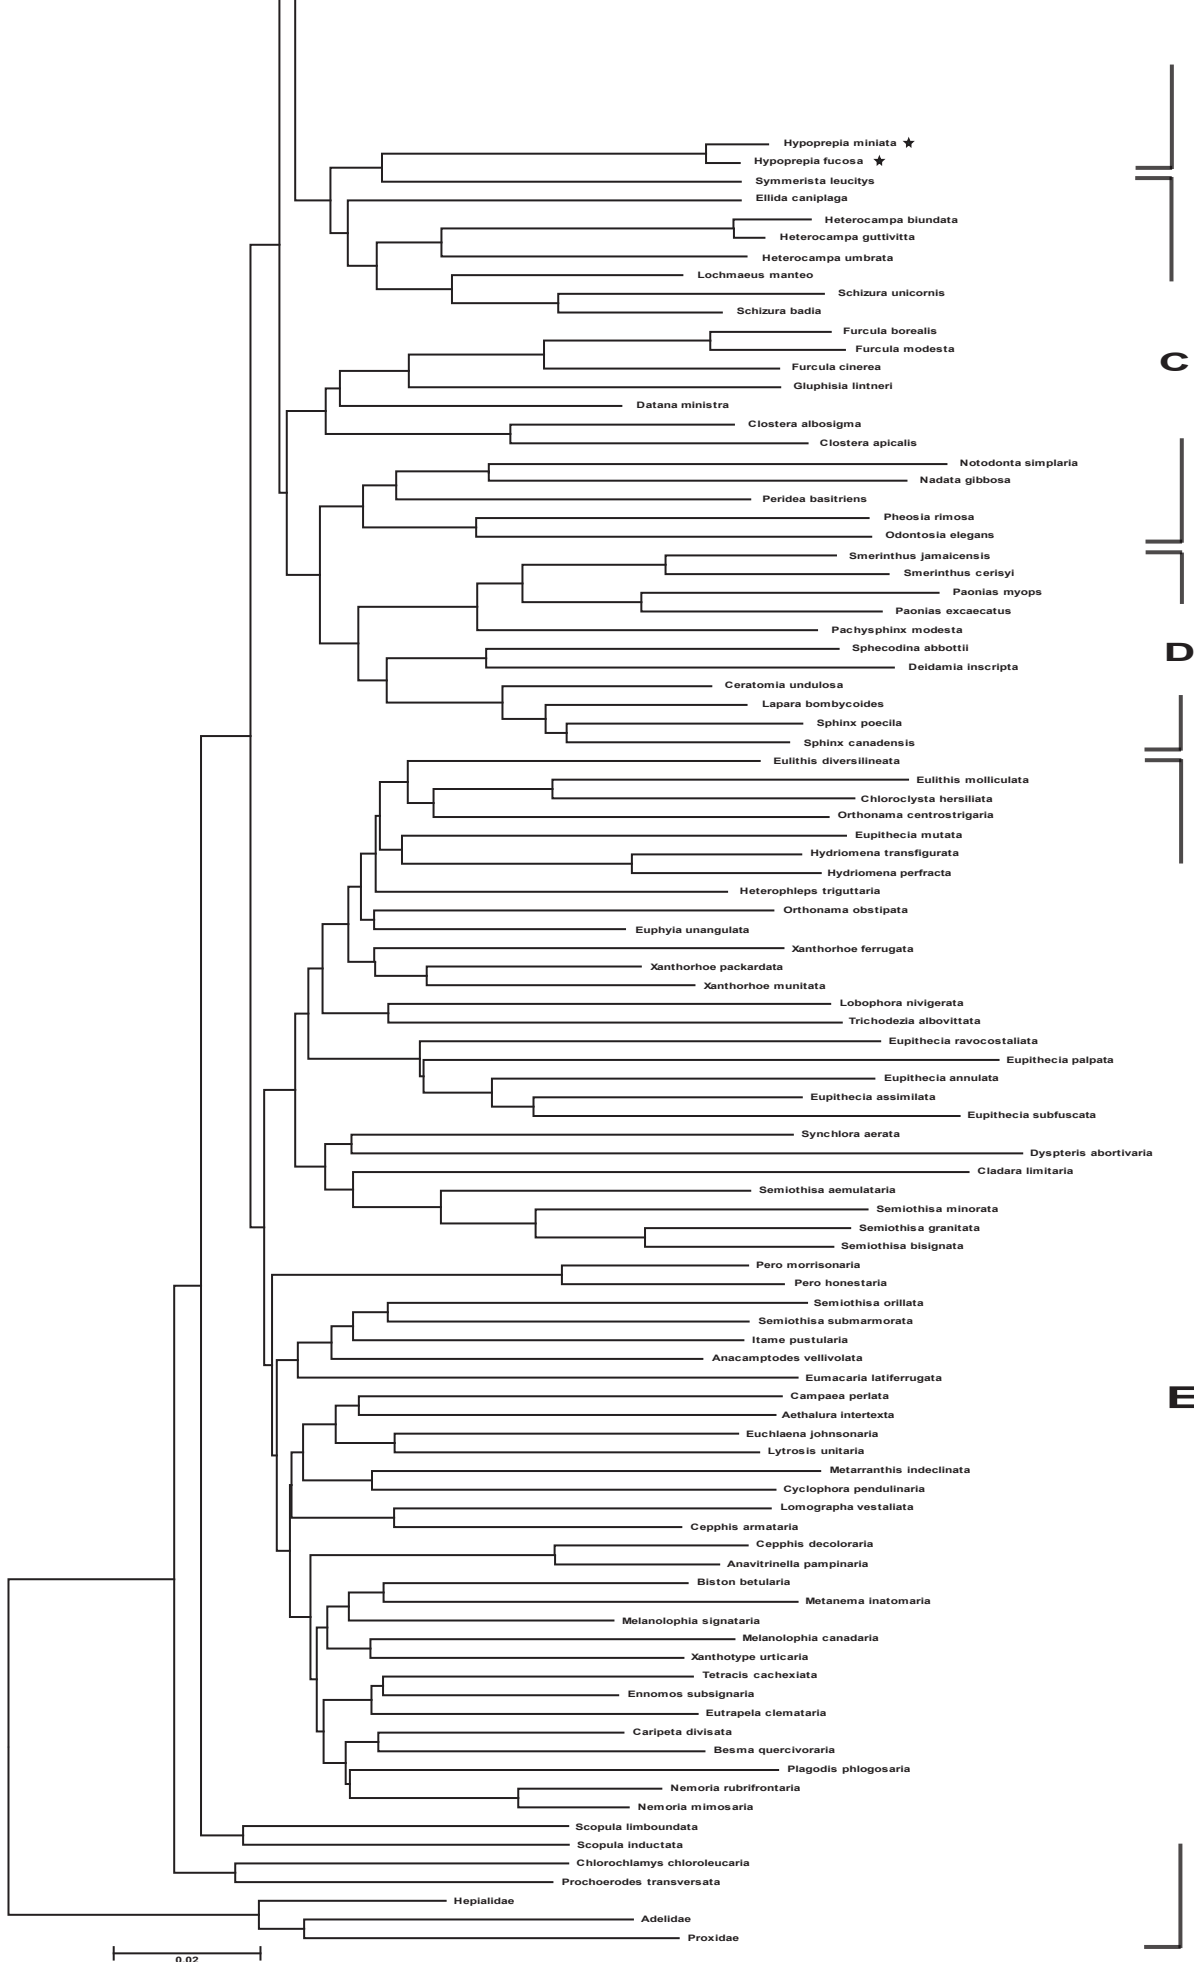

C

D

E

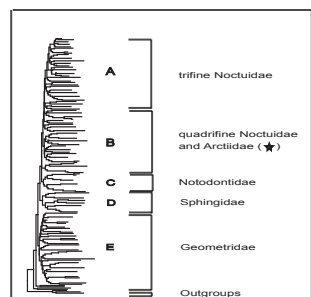

APPENDIX E

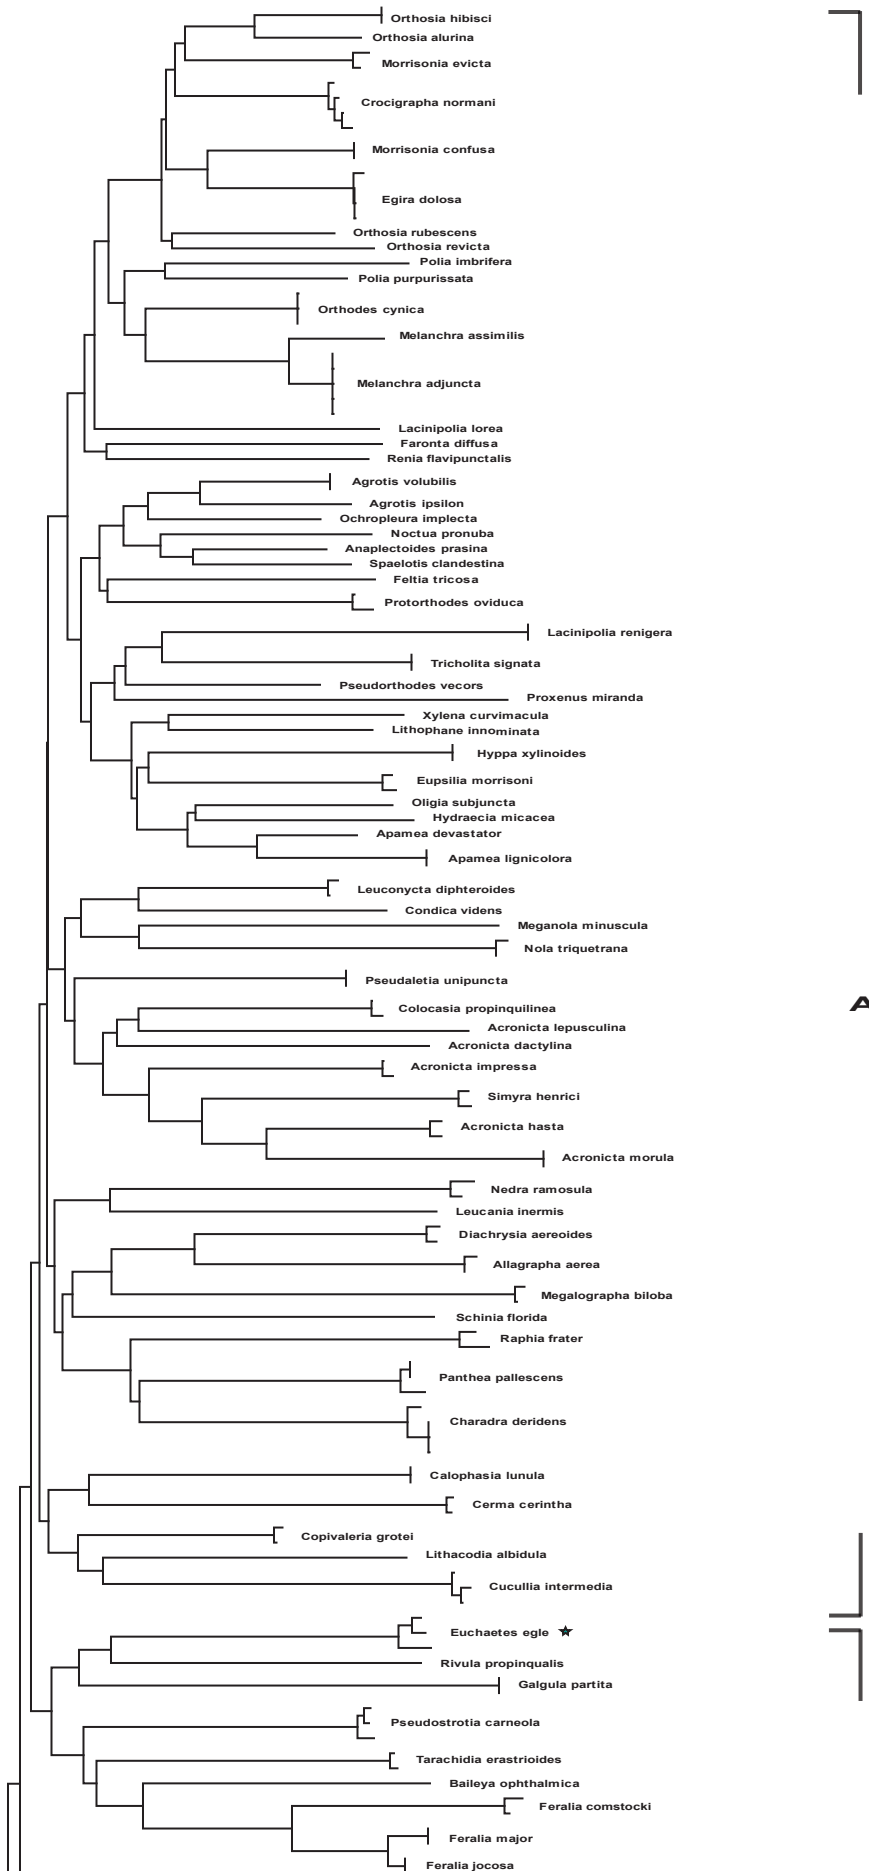



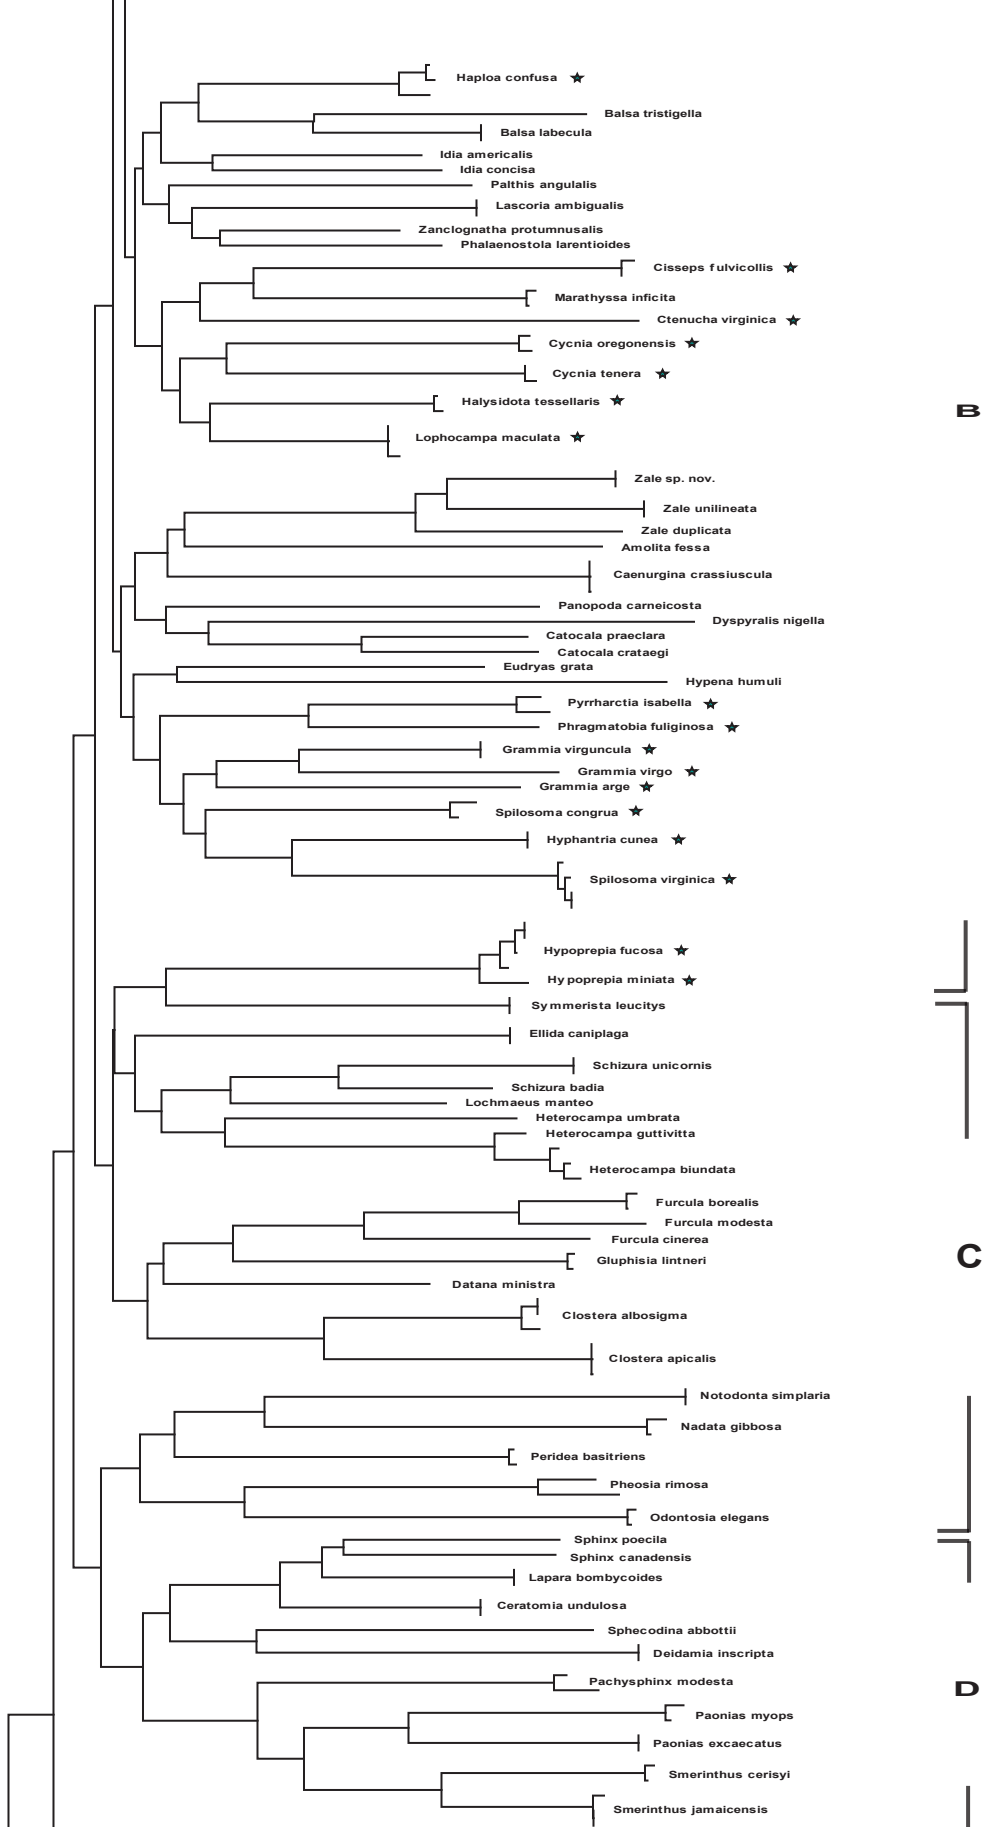

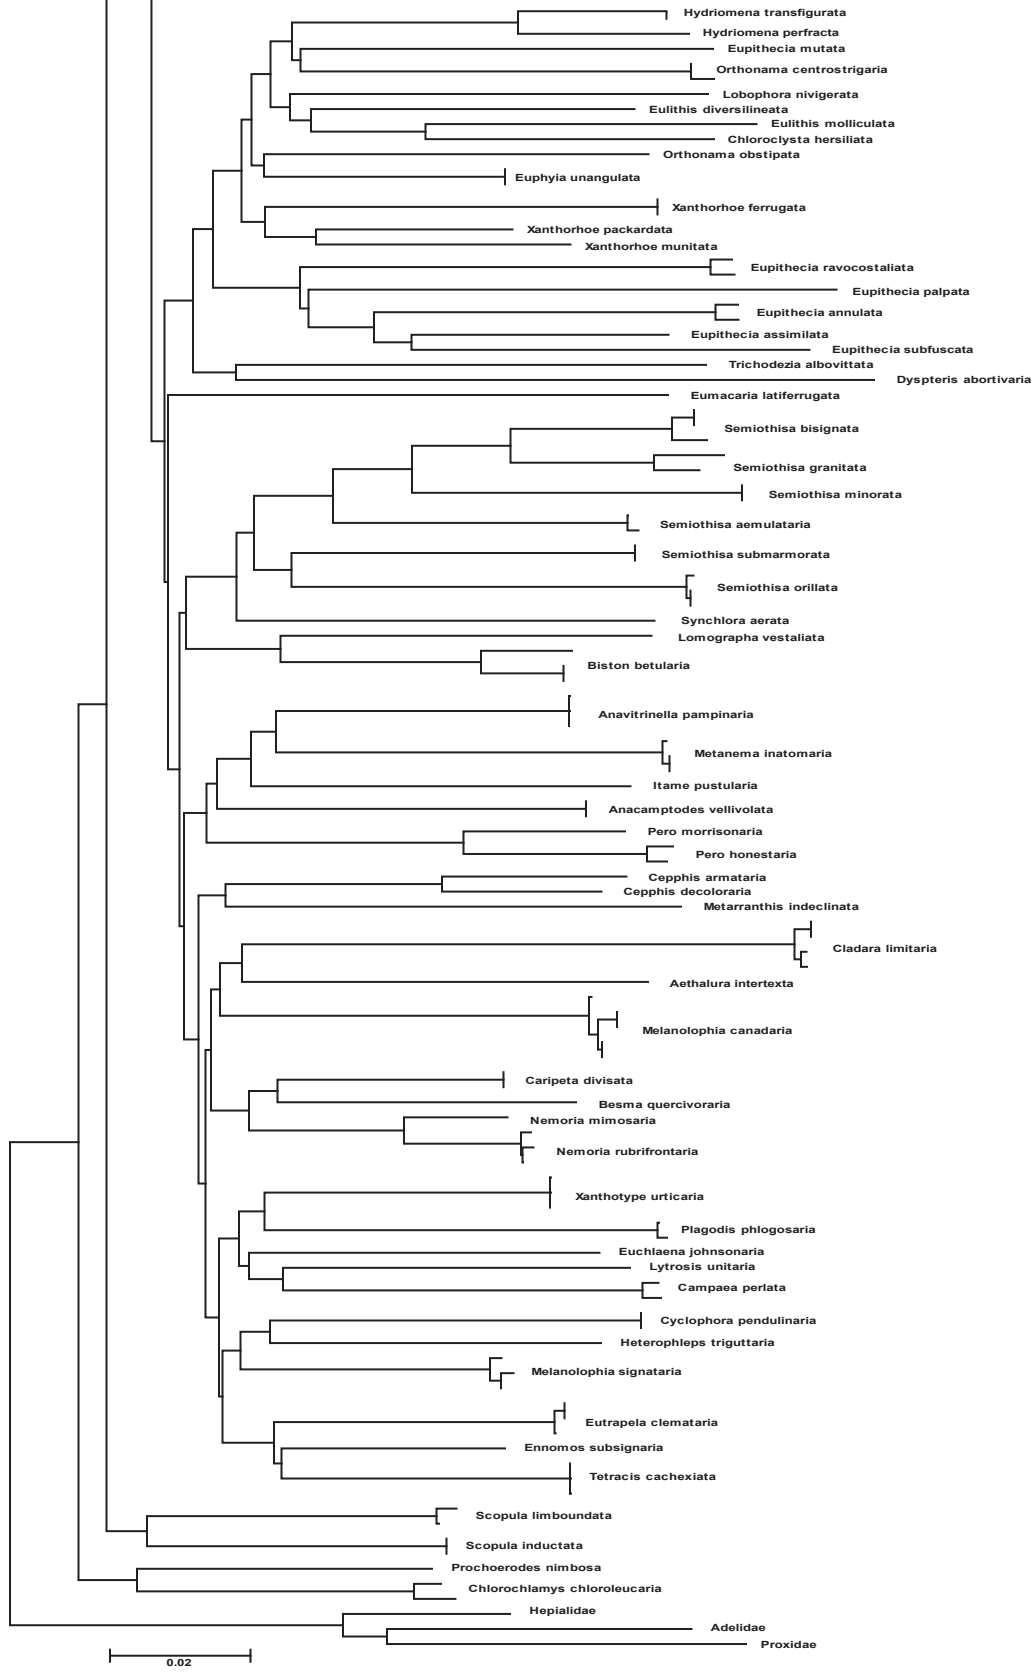

E

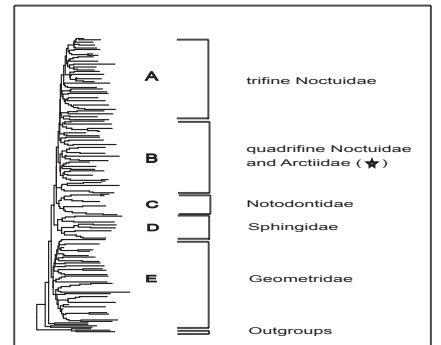

Supplement: 12614582s01.pdf [file 12614582s01.pdf]
